# Supplementary material for: Natural Products Induce Different Anti-Tumor Immune Responses in Murine Models of 4T1 Mammary Carcinoma and B16-F10 Melanoma
Source: MDPI journal article supplement (doi:10.3390/ijms242316698), 2023-11-24
Supplement: s1 [file s1]

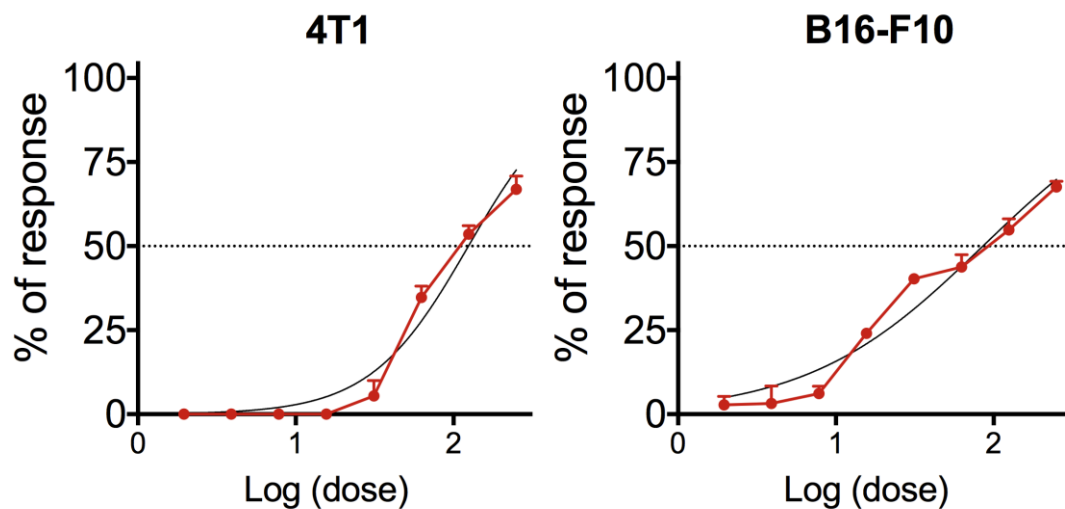

**Figure S1.** Dose–response viability curve. Cells were seeded in 96-well plates and treated with different concentrations of *P. nigrum* extract for 48 h. Viability were determined by the MTT method described in Materials and Methods. The IC<sub>50</sub> value was calculated using GraphPad Prism version 8.1.1 for Mac OS X statistics software (GraphPad Software, San Diego, CA). Black line: nonlinear regression curve fitting.

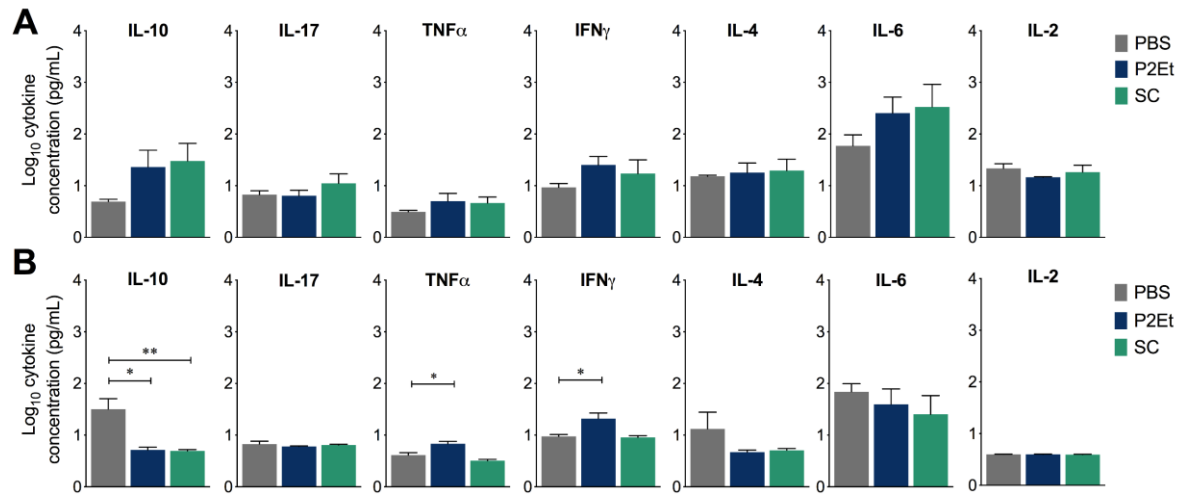

**Figure S2.** Cytokine levels in the serum of 4T1 tumor-bearing mice (A) or B16-F10 tumor-bearing mice (B) treated with Anamu-SC, P2Et, or PBS (control). The data were log-transformed and plotted as the mean  $\pm$  SEM.

**Table S1.** List of antibodies for flow cytometry

| Target       | Conjugate            | Clone        | Company         | Multicolor panel |
|--------------|----------------------|--------------|-----------------|------------------|
| CD45         | PE-Cy5               | 30-F11       | Biolegend       | 1                |
| CD3          | Pacific Blue         | 17A2         | Biolegend       | 1                |
| CD4          | Brilliant Violet 570 | RM4-5        | Biolegend       | 1                |
| CD8          | PE-Dazzle 594        | 53.6.7       | Biolegend       | 1                |
| CD11c        | FITC                 | HL3          | BD Biosciencies | 1                |
| CD11b        | Alexa Fluor 700      | M1/70        | Biolegend       | 1                |
| Ly6C         | APC-Cy7              | AL-21        | Biolegend       | 1                |
| Ly6G         | PE-Cy7               | 1A8          | Biolegend       | 1                |
| CD45         | PE-Cy5               | 30-F11       | Biolegend       | 2                |
| CD3          | Pacific Blue         | 17A2         | Biolegend       | 2                |
| CD4          | Brilliant Violet 570 | RM4-5        | Biolegend       | 2                |
| CD8          | PE-Dazzle 594        | 53.6.7       | Biolegend       | 2                |
| CD44         | PE-Cy7               | IM7          | Biolegend       | 2                |
| CD25         | APC                  | 3C7          | Biolegend       | 2                |
| CTLA-4       | PE                   | UC10-4F10-11 | Biolegend       | 2                |
| FoxP3        | FICT                 | MF23         | BD Biosciencies | 2                |
| CD45         | PE-Cy5               | 30-F11       | Biolegend       | 3                |
| CD3          | Pacific Blue         | 17A2         | Biolegend       | 3                |
| CD4          | Brilliant Violet 570 | RM4-5        | Biolegend       | 3                |
| CD8          | PE-Dazzle 594        | 53.6.7       | Biolegend       | 3                |
| IFN $\gamma$ | Alexa Fluor 700      | XMG1.2       | BD Biosciencies | 3                |
| TNF $\alpha$ | PE-Cy7               | MP6-XT22     | BD Biosciencies | 3                |
| IL-2         | FITC                 | JES6-5H4     | BD Biosciencies | 3                |
| Perforin     | APC                  | S16009A      | Biolegend       | 3                |
| Granzyme B   | PE                   | QA16A02      | Biolegend       | 3                |
